# Supplementary material for: Comment on “Climate consequences of hydrogen emissions” by Ocko and Hamburg (2022)
Source: Copernicus journal article supplement (doi:10.5194/acp-23-6011-2023), 2023-06-01
Supplement: Supplementary file 1 [file acp-23-6011-2023-supplement.pdf]

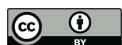

*Supplement of*

**Comment on “Climate consequences of hydrogen emissions” by Ocko and Hamburg (2022)**

**Lei Duan and Ken Caldeira**

*Correspondence to:* Lei Duan ([leiduan@carnegiescience.edu](mailto:leiduan@carnegiescience.edu))

The copyright of individual parts of the supplement might differ from the article licence.

13 **Text S1. Solutions with a continuous emission to  $tp$**

14 (Warwick et al., 2022) considered a continuous emission scenario to the time  $tp$ . In our analytic  
 15 solutions, considering a continuous unit emission scenario to time  $tp$  where:

$$16 \quad \begin{cases} f_{H_2}(t) = 1, & \text{if } t \leq tp \\ f_{H_2}(t) = 0, & \text{if } t > tp \end{cases} \quad (S1)$$

17 Radiative forcing can be represented as:

$$18 \quad \widehat{R}_{H_2}(t) = \int_0^{\min(t, tp)} R_{H_2}(t - \tau) d\tau \quad (S2)$$

19 Radiative forcing is thus:

$$20 \quad \begin{aligned} R_{H_2, cont}(t) = & \frac{A_{CH_4}^* a_{CH_4} \tau_{H_2} \tau_{CH_4} \left( \tau_{H_2} e^{-\frac{t}{\tau_{H_2}}} \left( e^{\frac{tp}{\tau_{H_2}}} - 1 \right) - \tau_{CH_4} e^{-\frac{t}{\tau_{CH_4}}} \left( e^{\frac{tp}{\tau_{CH_4}}} - 1 \right) \right)}{\tau_{H_2} - \tau_{CH_4}} \\ & + \frac{A_{O_3} a_{O_3} \tau_{H_2} \tau_{O_3} \left( \tau_{H_2} e^{-\frac{t}{\tau_{H_2}}} \left( e^{\frac{tp}{\tau_{H_2}}} - 1 \right) - \tau_{O_3} e^{-\frac{t}{\tau_{O_3}}} \left( e^{\frac{tp}{\tau_{O_3}}} - 1 \right) \right)}{\tau_{H_2} - \tau_{O_3}} \\ & + \frac{A_{H_2O} a_{H_2O} \tau_{H_2} \tau_{H_2O} \left( \tau_{H_2} e^{-\frac{t}{\tau_{H_2}}} \left( e^{\frac{tp}{\tau_{H_2}}} - 1 \right) - \tau_{H_2O} e^{-\frac{t}{\tau_{H_2O}}} \left( e^{\frac{tp}{\tau_{H_2O}}} - 1 \right) \right)}{\tau_{H_2} - \tau_{H_2O}} \end{aligned} \quad (S3)$$

21 Correspondingly, the time-integrated radiative forcing under a continuous emission scenario to  
 22 time  $tp$  is:

23  $CAGWP_{H_2}(H)$

$$24 \quad = \frac{A_{CH_4}^* a_{CH_4} \tau_{H_2} \tau_{CH_4} \left( \tau_{H_2}^2 e^{\frac{-H}{\tau_{H_2}}} \left( e^{\frac{tp}{\tau_{H_2}}} - 1 \right) - \tau_{CH_4}^2 e^{\frac{-H}{\tau_{CH_4}}} \left( e^{\frac{tp}{\tau_{CH_4}}} - 1 \right) + tp(\tau_{CH_4} - \tau_{H_2}) \right)}{\tau_{CH_4} - \tau_{H_2}} \\ 25 \quad + \frac{A_{O_3} a_{O_3} \tau_{H_2} \tau_{O_3} \left( \tau_{H_2}^2 e^{\frac{-H}{\tau_{H_2}}} \left( e^{\frac{tp}{\tau_{H_2}}} - 1 \right) - \tau_{O_3}^2 e^{\frac{-H}{\tau_{O_3}}} \left( e^{\frac{tp}{\tau_{O_3}}} - 1 \right) + tp(\tau_{O_3} - \tau_{H_2}) \right)}{\tau_{O_3} - \tau_{H_2}} \quad (S4)$$

$$\begin{aligned}
& A_{H_2O} a_{H_2O} \tau_{H_2} \tau_{H_2O} \left( \tau_{H_2}^2 e^{\frac{-H}{\tau_{H_2}}} \left( e^{\frac{tp}{\tau_{H_2}}} - 1 \right) - \tau_{H_2O}^2 e^{\frac{-H}{\tau_{H_2O}}} \left( e^{\frac{tp}{\tau_{H_2O}}} - 1 \right) + tp(\tau_{H_2O} - \tau_{H_2}) \right) \\
26 \quad & + \frac{\phantom{A_{H_2O} a_{H_2O} \tau_{H_2} \tau_{H_2O} \left( \tau_{H_2}^2 e^{\frac{-H}{\tau_{H_2}}} \left( e^{\frac{tp}{\tau_{H_2}}} - 1 \right) - \tau_{H_2O}^2 e^{\frac{-H}{\tau_{H_2O}}} \left( e^{\frac{tp}{\tau_{H_2O}}} - 1 \right) + tp(\tau_{H_2O} - \tau_{H_2}) \right)}}{\tau_{H_2O} - \tau_{H_2}}
\end{aligned}$$

27 Note that this equation differs slightly from that given in Warwick et al. (2022), which included a  
28 minor mistake in integration bounds after communications with the authors of Warwick et al.  
29 (2022).

30 The corresponding equations for continuous emissions of CO<sub>2</sub> and CH<sub>4</sub> to time  $tp$  can be  
31 represented as:

$$32 \quad R_{CO_2,cont}(t) = A_{CO_2} \left( a_0 tp + \sum_{i=1}^3 a_i \tau_i e^{-\frac{t}{\tau_i}} \left( e^{\frac{tp}{\tau_i}} - 1 \right) \right) \quad (S5)$$

$$33 \quad R_{CH_4,cont}(t) = (1 + f_1 + f_2) A_{CH_4} \tau_{CH_4} e^{-\frac{t}{\tau_{CH_4}}} \left( e^{\frac{tp}{\tau_{CH_4}}} - 1 \right) \quad (S6)$$

34 And CAGWP for continuous emissions of CO<sub>2</sub> and CH<sub>4</sub> to time  $tp$  is:

$$35 \quad CAGWP_{CO_2}(H) = \frac{A_{CO_2}}{2} \left( a_0 tp(2H - tp) + \sum_{i=1}^3 2a_i \tau_i \left( tp - \tau_i e^{-\frac{H}{\tau_i}} \left( e^{\frac{tp}{\tau_i}} - 1 \right) \right) \right) \quad (S7)$$

$$36 \quad CAGWP_{CH_4}(H) = (1 + f_1 + f_2) A_{CH_4} \tau_{CH_4} \left( tp - \tau_{CH_4} e^{-\frac{H}{\tau_{CH_4}}} \left( e^{\frac{tp}{\tau_{CH_4}}} - 1 \right) \right) \quad (S8)$$

37 **Text S2. CAGWP components from analytic solutions**

38 In this section, we show equations calculating the three components used in (Ocko and Hamburg,  
39 2022), which are denoted as CAGWP here. These equations are derived based on analytic  
40 solutions as discussed in the main text and are considered for continuous emissions scenarios.  
41 The physical meanings of these equations are explained in Warwick et al. (2022).  
42 The first component ( $CAGWP_{i_1}$ ) represents radiative forcing caused by chemical perturbations  
43 to radiative forcing during the emission period  $tp$ :

$$44 \quad CAGWP_{i_1}(H) = \frac{A_i a_i \tau_{H_2} \tau_i \left( \tau_{H_2} \left( \left( 1 - e^{-\frac{tp}{\tau_{H_2}}} \right) - tp \right) - \tau_i \left( \left( 1 - e^{-\frac{tp}{\tau_i}} \right) - tp \right) \right)}{\tau_i - \tau_{H_2}} \quad (S1)$$

45 Where  $A_i$  is the scaling factor that converts molar mass of species  $i$  (i.e.,  $CH_4$ ,  $O_3$ , or  $H_2O$ ) to  
46  $W m^{-2}$ ,  $a_i$  is the factor representing the impact of remaining hydrogen in the atmosphere on the  
47 atmospheric molar mass of different species,  $\tau_i$  is the lifetime of different species,  $\tau_{H_2}$  is the  
48 lifetime of  $H_2$ , and  $tp$  is the emission period.

49 The second component ( $CAGWP_{i_2}$ ) represents the chemical perturbation to radiative forcing at  
50 timescale  $H$  resulting from the emitted species remaining in the atmosphere following the end of  
51 the emission period:

$$52 \quad CAGWP_{i_2}(H) = \frac{A_i a_i \tau_{H_2}^2 \tau_i \left( 1 - e^{-\frac{tp}{\tau_{H_2}}} \right) \left( \tau_{H_2} \left( e^{-\frac{tp}{\tau_{H_2}} - \frac{H}{\tau_{H_2}}} \right) + \tau_i e^{-\frac{tp}{\tau_{H_2}}} \left( e^{\frac{tp}{\tau_i} \frac{H}{\tau_i - 1}} \right) \right)}{\tau_i - \tau_{H_2}} \quad (S2)$$

53 The third component ( $CAGWP_{i_3}$ ) is the decay of radiative forcing generated during continuous  
54 emission period  $tp$ :

$$55 \quad CAGWP_{i_3}(H) = \frac{A_i a_i \tau_{H_2} \tau_i^2 e^{-\frac{H\tau_{H_2} + tp(\tau_i + \tau_{H_2})}{\tau_i \tau_{H_2}}} \left( e^{\frac{H}{\tau_i}} - e^{\frac{tp}{\tau_i}} \right) \left( \tau_{H_2} e^{\frac{tp}{\tau_i}} \left( 1 - e^{-\frac{tp}{\tau_{H_2}}} \right) - \tau_i e^{\frac{tp}{\tau_{H_2}}} \left( 1 - e^{-\frac{tp}{\tau_i}} \right) \right)}{\tau_i - \tau_{H_2}} \quad (S3)$$

56 As in (Ocko and Hamburg, 2022), the overall CAGWP for each species  $i$  under given period  $tp$   
57 and timescale  $H$  is:

$$58 \quad CAGWP_i(H) = CAGWP_{i_1}(H) + CAGWP_{i_2}(H) + CAGWP_{i_3}(H) \quad (S4)$$

59 And CAGWP for emissions of hydrogen is:

$$60 \quad CAGWP_{H_2}(H) = (1 + f_1 + f_2) CAGWP_{CH_4}(H) + CAGWP_{O_3}(H) + CAGWP_{H_2O}(H) \quad (S5)$$

61 Comparisons between our newly derived equations and equations used in Ocko and Hamburg  
62 (2022) are shown in Figure S11. In addition, we tested our solutions by calculating the following  
63 cases:

64 **Case 1:** set  $tp = 2$  and  $H = 2$ , which represents CAGWP at year 2 for a 2-year emission;

65 **Case 2:** set  $tp = 1$  and  $H = 2$ , which represents CAGWP at year 2 for a 1-year emission;

66 **Case 3:** set  $tp = 1$  and  $H = 1$ , which represents CAGWP at year 1 for a 1-year emission.

67 For a linear system, CAGWP for case 1 should equal the sum of CAGWP for case 2 and case 3.

68 Equations from our analytic solutions give the same numerical values for the above cases,

69 indicating robustness of our conceptual solutions.

70 **Text S3. Uncertainty in temperature response**

71 We compare results of equation (24) in the main text with results of the following: equation from  
72 (Boucher and Reddy, 2008):

73 
$$T(t) = 1.06 \left( \frac{0.595}{8.4} e^{-\frac{t}{8.4}} + \frac{0.405}{409.5} e^{-\frac{t}{409.5}} \right) \quad (S6)$$

74 OSCAR v2.2 (average of ensemble):

75 
$$T(t) = 0.852 \left( \frac{0.572}{3.50} e^{-\frac{t}{3.50}} + \frac{0.428}{166} e^{-\frac{t}{166}} \right) \quad (S7)$$

76 and equation from (Caldeira and Myhrvold, 2013) using CMIP5 ensemble results:

77 
$$T(t) = 0.987 \left( \frac{0.551}{3.62} e^{-\frac{t}{3.62}} + \frac{0.449}{219} e^{-\frac{t}{219}} \right) \quad (S8)$$

78 **Text S4. Climate impact of hydrogen or fossil fuels**

79 For green hydrogen, radiative forcing and temperature response from hydrogen leakages ( $L_{H_2}$ )  
80 are:

81 
$$R_{green-hydrogen} = R_{H_2}L_{H_2} \quad (S9a)$$

82 
$$AGTP_{green-hydrogen} = AGTP_{H_2}L_{H_2} \quad (S9b)$$

83 For blue hydrogen, both hydrogen and methane leakages ( $L_{H_2}$  and  $L_{CH_4}$ ) are included, and  
84 radiative forcing and temperature response are represented as:

85 
$$R_{blue-hydrogen} = R_{H_2}L_{H_2} + R_{CH_4}L_{CH_4} \quad (S10a)$$

86 
$$AGTP_{blue-hydrogen} = AGTP_{H_2}L_{H_2} + AGTP_{CH_4}L_{CH_4} \quad (S10b)$$

87 For fossil fuel, we only consider the avoided CO<sub>2</sub> emissions ( $E_{CO_2}$ ) in our central cases in line  
88 with Ocko and Hamburg (2022):

89 
$$R_{fossil-fuel} = R_{CO_2}E_{CO_2} \quad (S11a)$$

90 
$$AGTP_{fossil-fuel} = AGTP_{CO_2}E_{CO_2} \quad (S11b)$$

91 and we compared results with those that included both CO<sub>2</sub> emissions and methane leakages:

92 
$$R_{fossil-fuel} = R_{CO_2}E_{CO_2} + R_{CH_4}L_{CH_4} \quad (S12a)$$

93 
$$AGTP_{fossil-fuel} = AGTP_{CO_2}E_{CO_2} + AGTP_{CH_4}L_{CH_4} \quad (S12b)$$

94 **Figure S1.** Same as Figure 1 but showing ratios of the climate impact of methane (CH<sub>4</sub>) and  
95 hydrogen (H<sub>2</sub>) to carbon dioxide (CO<sub>2</sub>) emissions. While the residence time of hydrogen is  
96 shorter than that of methane, hydrogen emissions result in an increase in methane concentration  
97 that decays on the methane time scale. Thus, while the effects of methane and hydrogen differ in  
98 magnitude, the temporal pattern of response is similar.

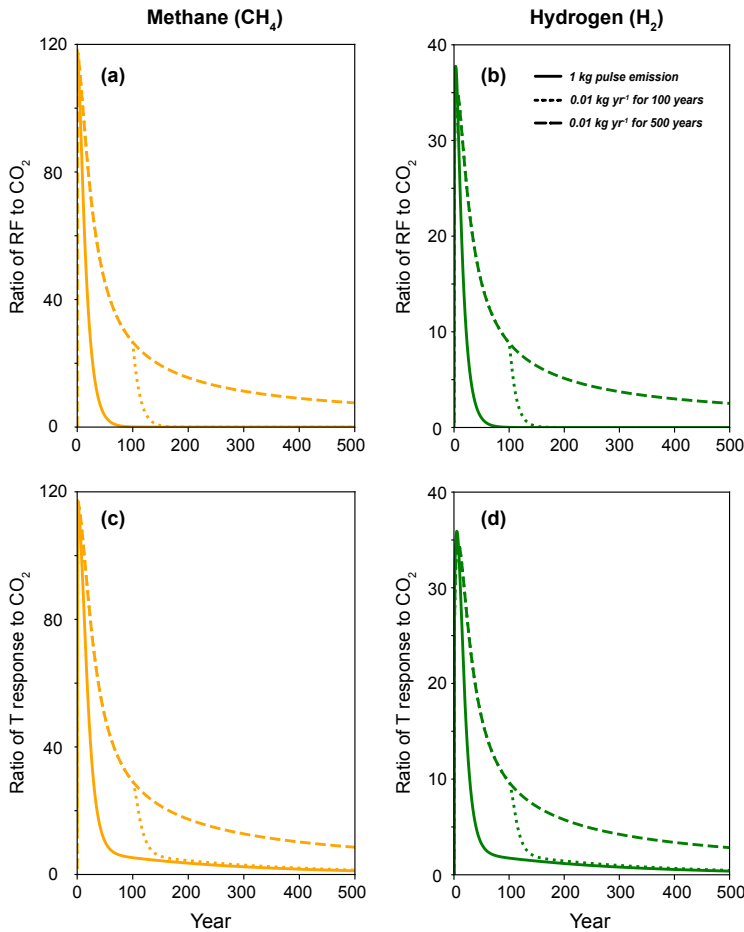

99



100 **Figure S2.** Climate impact from emissions of different species. Similar to Figure 1, but for 1 ppb  
101 increase scenarios. Note that CH<sub>4</sub> generates substantially larger climate impacts and has a y-axis  
102 scale that is 24 times than that of H<sub>2</sub> and CO<sub>2</sub>.

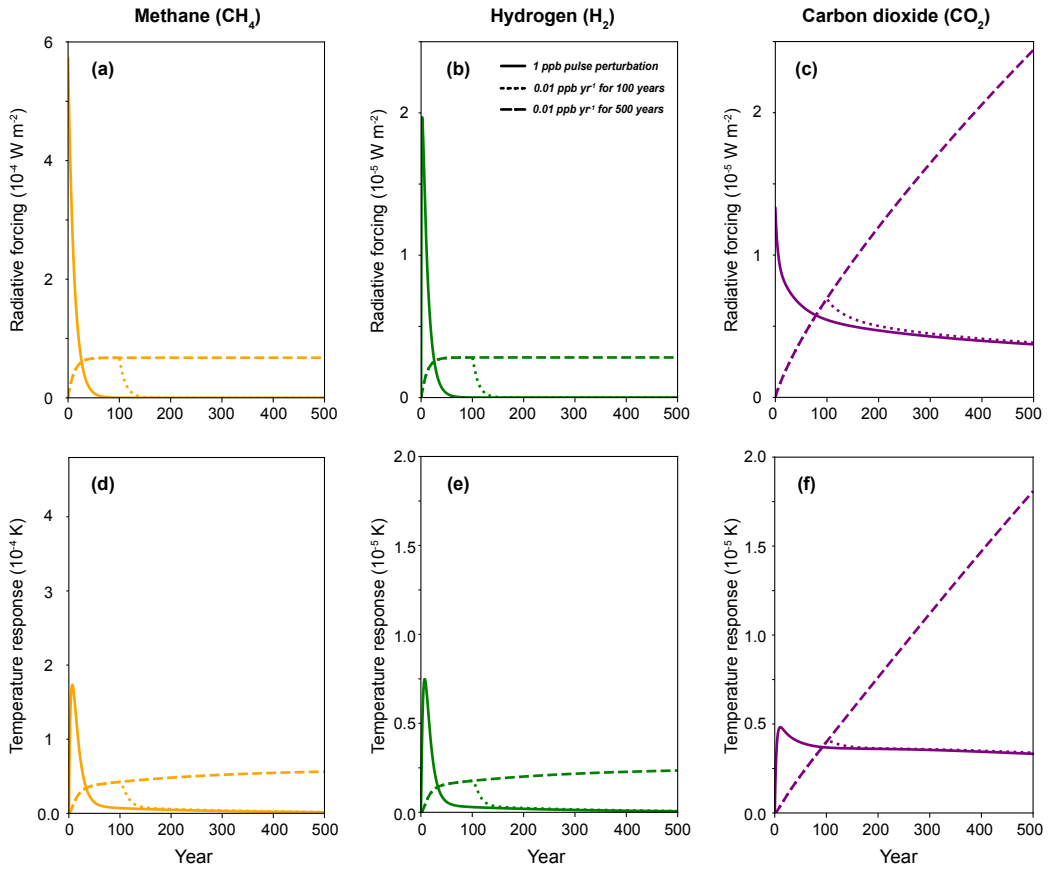

103

104 **Figure S3.** Impact of considering decayed CH<sub>4</sub> to CO<sub>2</sub>. In contrast to our central cases where  
105 CH<sub>4</sub> concentration diminishes over time, here we consider the conversion of decayed CH<sub>4</sub> to  
106 CO<sub>2</sub>, which has a longer lifetime and adds a long-term climate impact to the warming potential  
107 of methane.

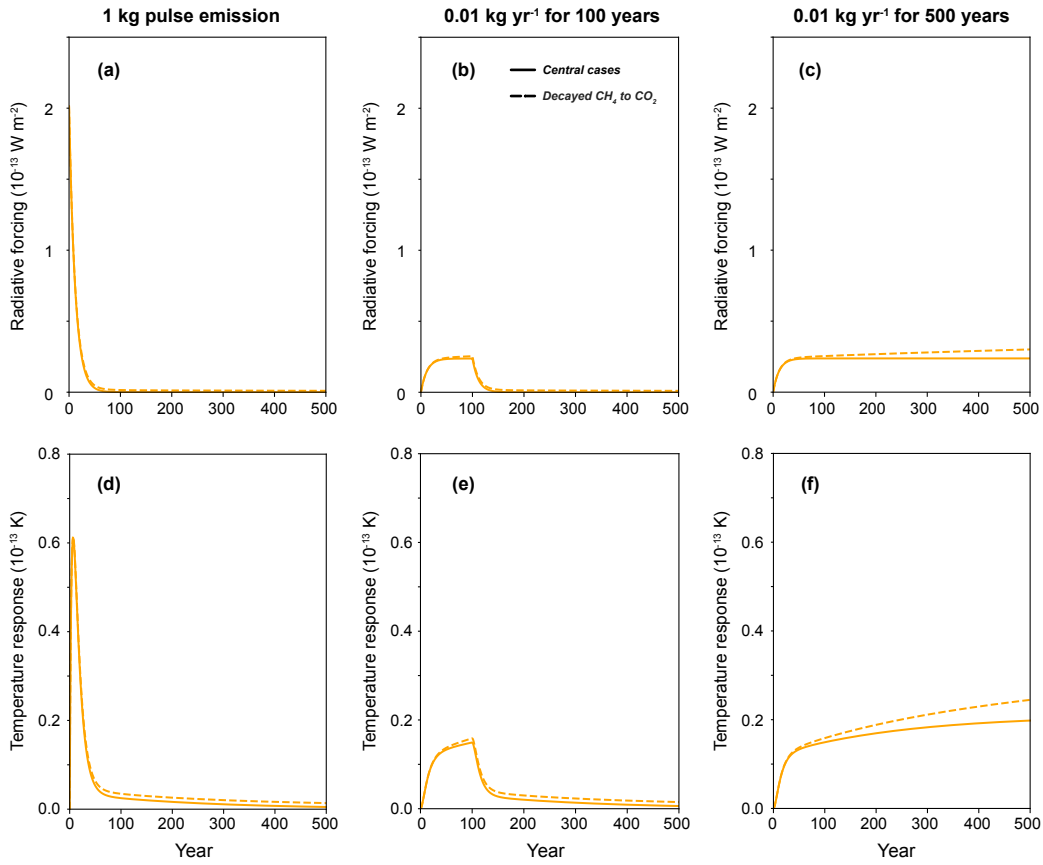

108

109 **Figure S4.** Climate impact from different hydrogen lifetimes. Radiative forcing and the global  
110 mean temperature response from emission of hydrogen under different scenarios. Solid line  
111 shows results under our central case, and shaded area represents results considering different  
112 hydrogen lifetimes (i.e., 1.4 years to 2.5 years).

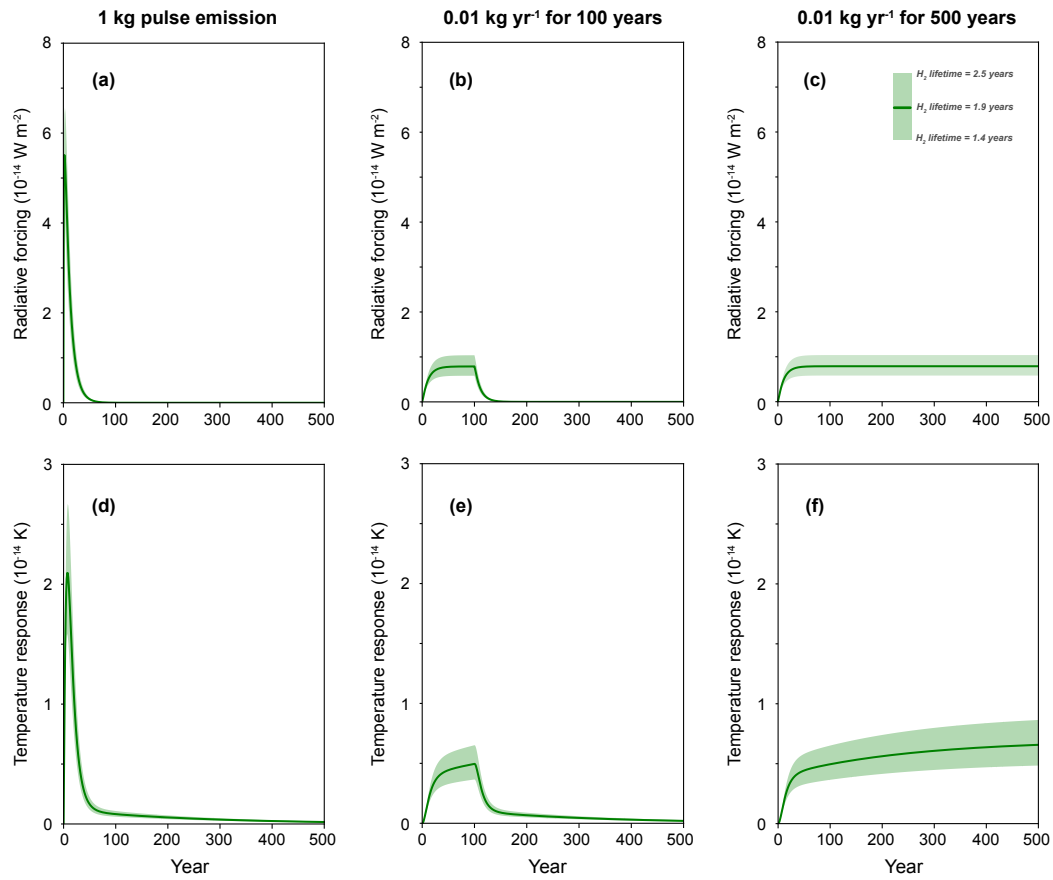

113

114 **Figure S5.** Contributions of methane (CH<sub>4</sub>) and hydrogen (H<sub>2</sub>) to clean hydrogen's warming  
 115 potentials. Here we show contributions to increases in radiative forcing and global mean  
 116 temperature response between the low and high leakage cases. Our results show that additional  
 117 leakages of methane (3 % in the high leakage case vs. 1 % in the low leakage case) contribute  
 118 more warming to blue hydrogen, with hydrogen leakages (10 % in the high leakage case vs. 1 %  
 119 in the low leakage case) playing a less important role. Results showing contributions for per  
 120 percentage increase in leakage rate are plotted in Figure S15.

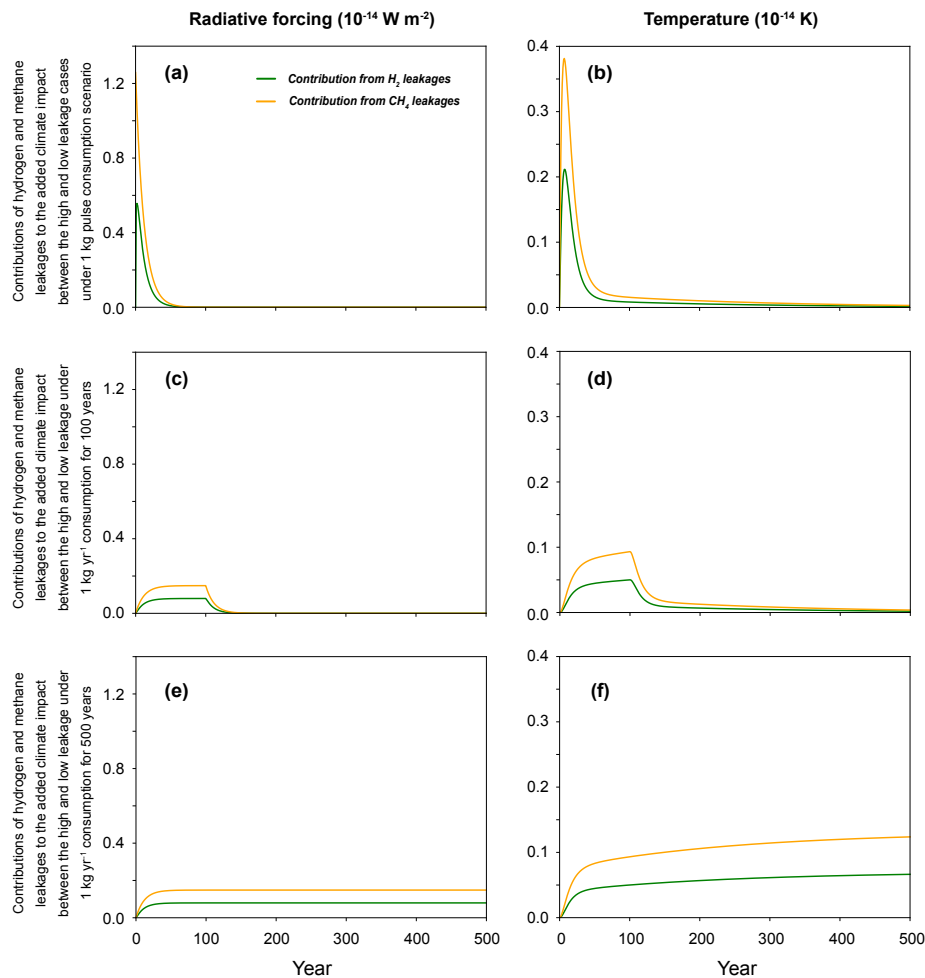

121

122 **Figure S6.** Factors influencing radiative forcing. Same as Figure 2, but here we examine the  
 123 change in radiative forcing associated with different parameters. These parameters include:  
 124 considering different hydrogen lifetimes (1.4 years or 2.5 years), include methane leakage for the  
 125 avoided CO<sub>2</sub> emissions, and considering the conversion of the decayed methane to CO<sub>2</sub>. The last  
 126 two factors have substantial impacts on the climate impact of fossil fuels and the net climate  
 127 impact of clean hydrogen, whereas hydrogen lifetime shows only a minor impact.

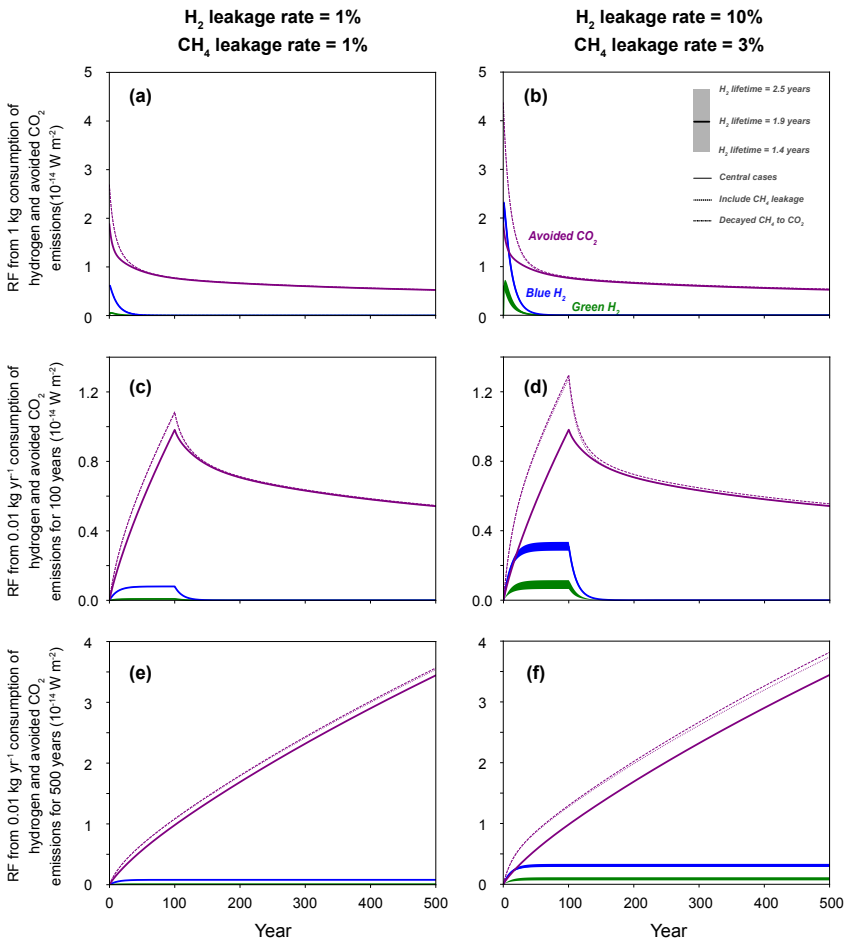

128

129 **Figure S7.** Factors influencing temperature response. Same as Figure S6, but considering  
 130 temperature instead of radiative forcing.

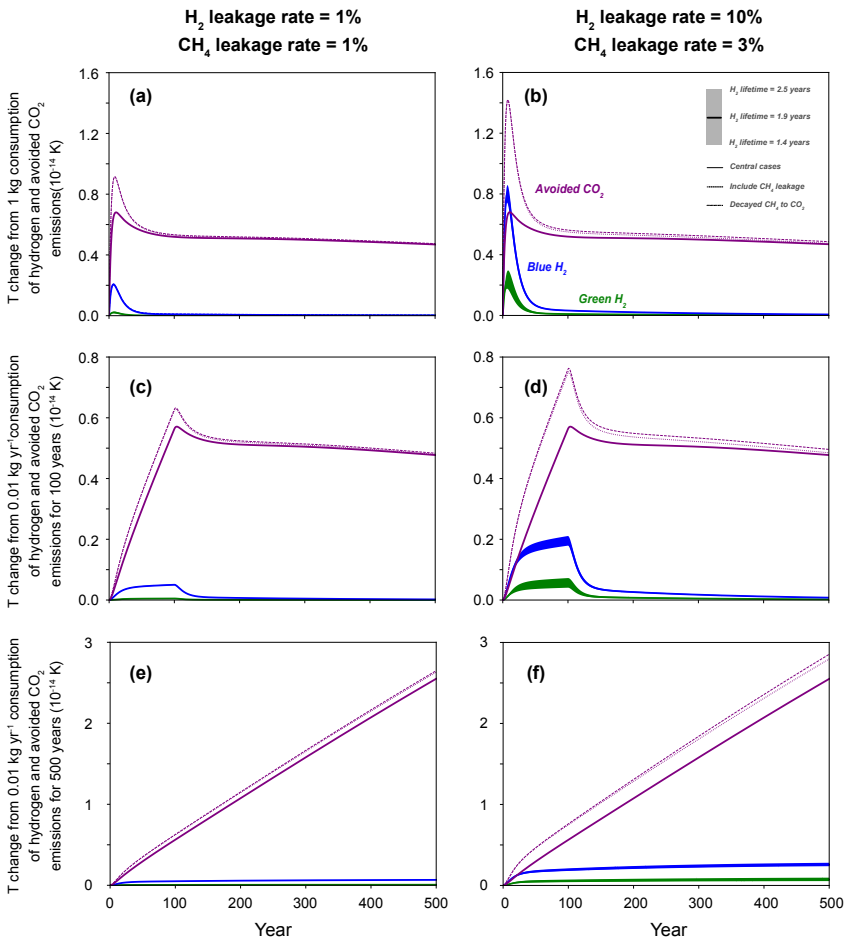

131

132 **Figure S8.** Uncertainty of avoided CO<sub>2</sub> amount. Radiative forcing and global mean temperature  
 133 response under different assumptions of the avoided CO<sub>2</sub> amount per kg hydrogen consumption  
 134 as in Ocko and Hamburg (2022). Solid line represents our central case (11 kg) and shaded area  
 135 represents results under alternative assumptions (i.e., 5 kg and 15 kg CO<sub>2</sub> avoided).

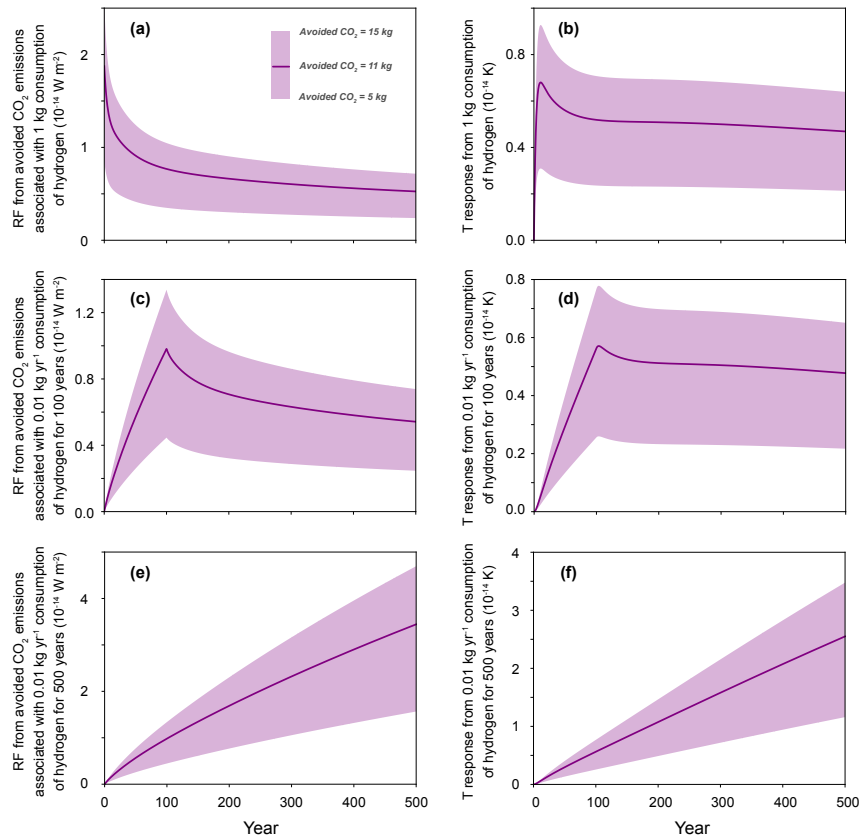

136

137 **Figure S9.** Uncertainty of the climate response functions. Same as Figure 3, but combining the  
 138 radiative forcing equations with different climate response functions.

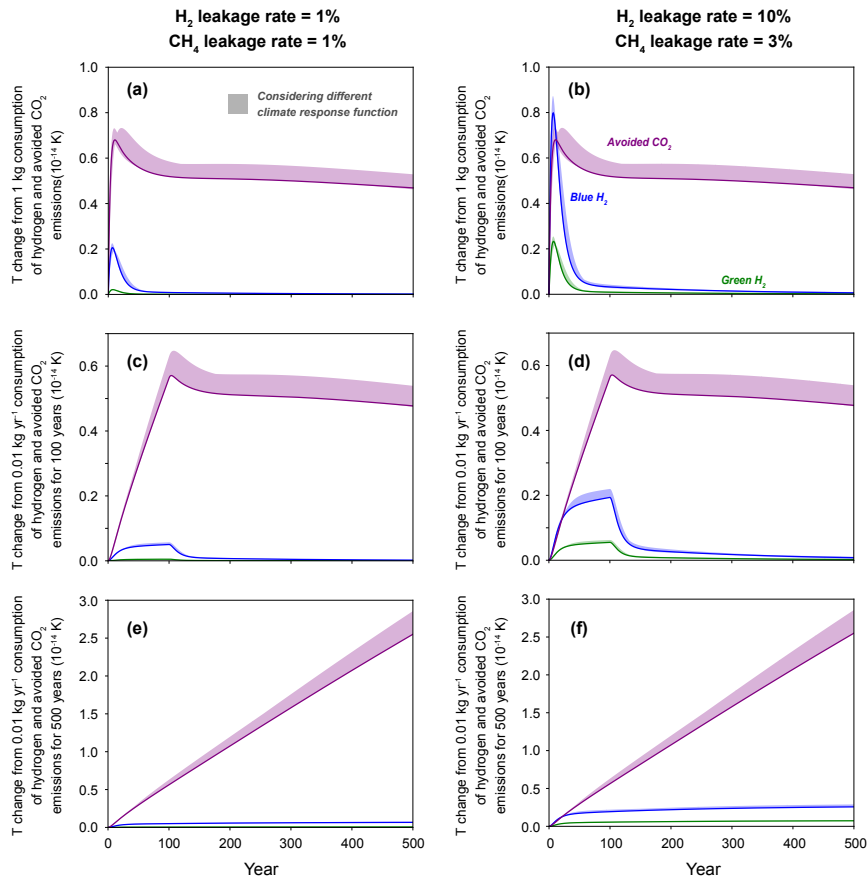

139



140 **Figure S10.** Comparisons of different metrics. Ratios of the time-integrated relative radiative  
141 forcing (CGWP) and ratios of the global mean temperature response (GTP) are compared under  
142 continuous emission scenarios. The solid lines are the ratios of the time-integrated radiative  
143 forcing shown in Figure 2 panel (e) and (f), and dashed lines are ratios of the temperature  
144 changes shown in Figure 3 panel (e) and (f).

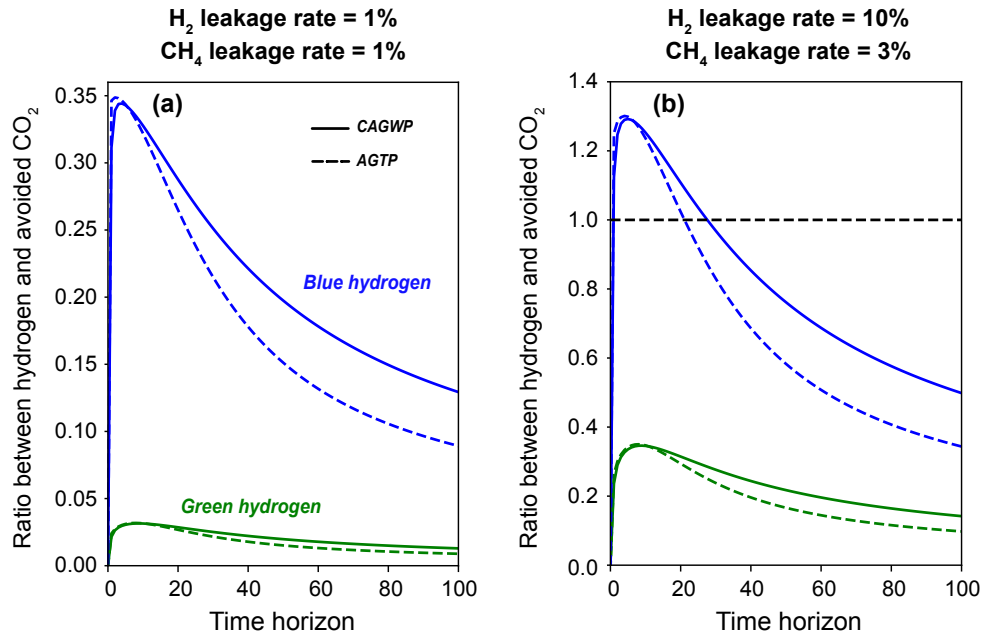

145

146 **Figure S11.** Comparisons between results from our newly derived equations and those used in  
147 Ocko and Hamburg (2022). Time-integrated radiative forcing (CAGWP defined in this analysis)  
148 from one-year emission and continuous emission scenarios are compared. All parameter values  
149 are taken from Ocko and Hamburg (2022).

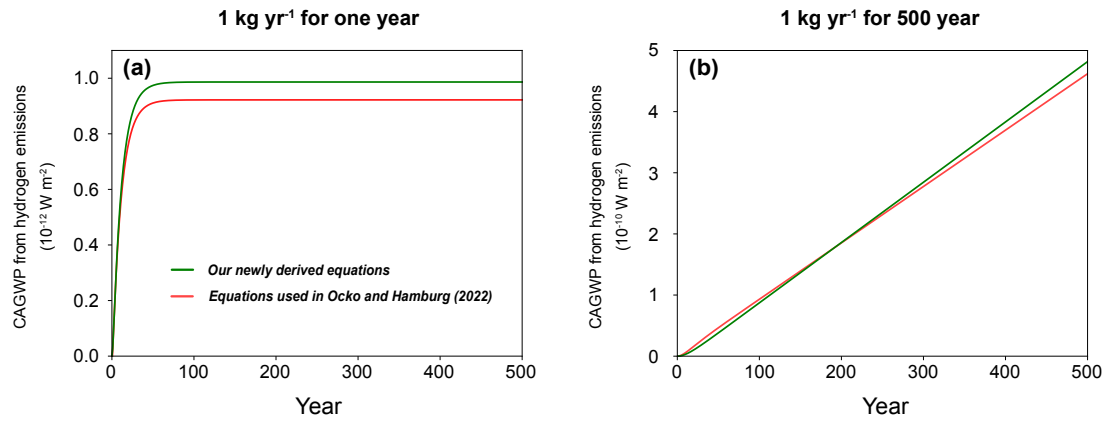

150

151 **Figure S12.** Similar to Figure 1 but for 100-year timescale.

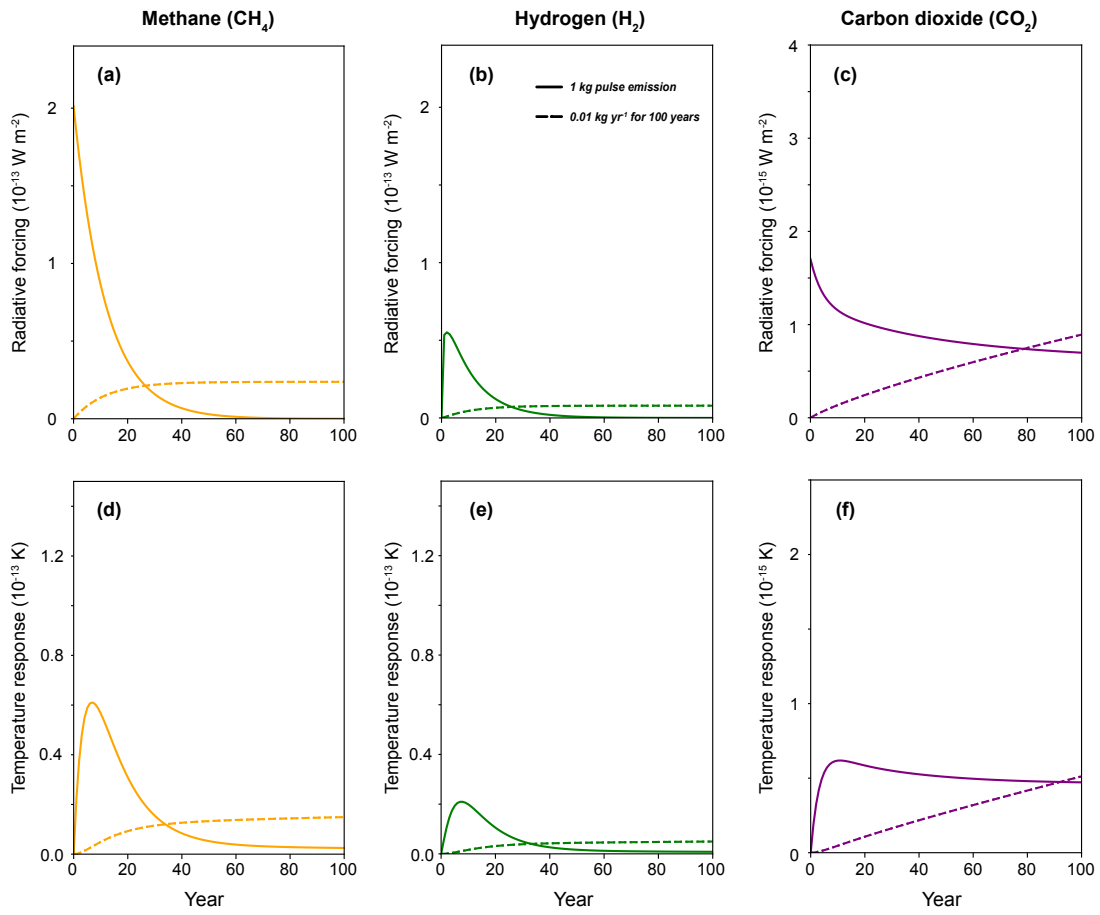

152

153 **Figure S13.** Similar to Figure 2 but for 100-year timescale.

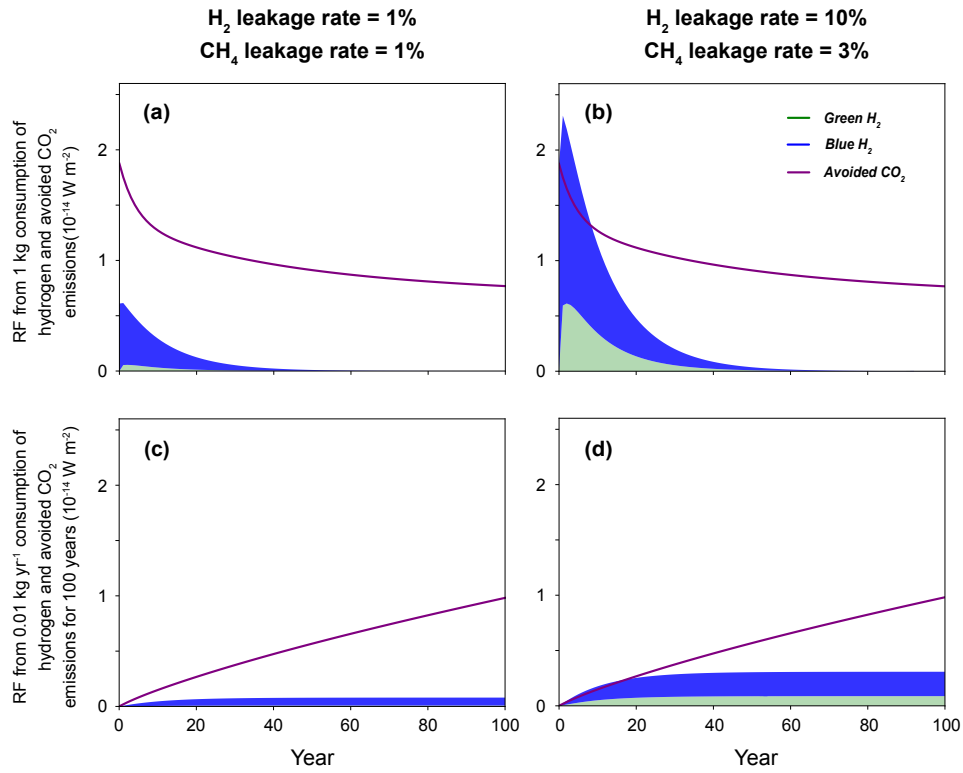

154

155 **Figure S14.** Similar to Figure 3 but for 100-year timescale.

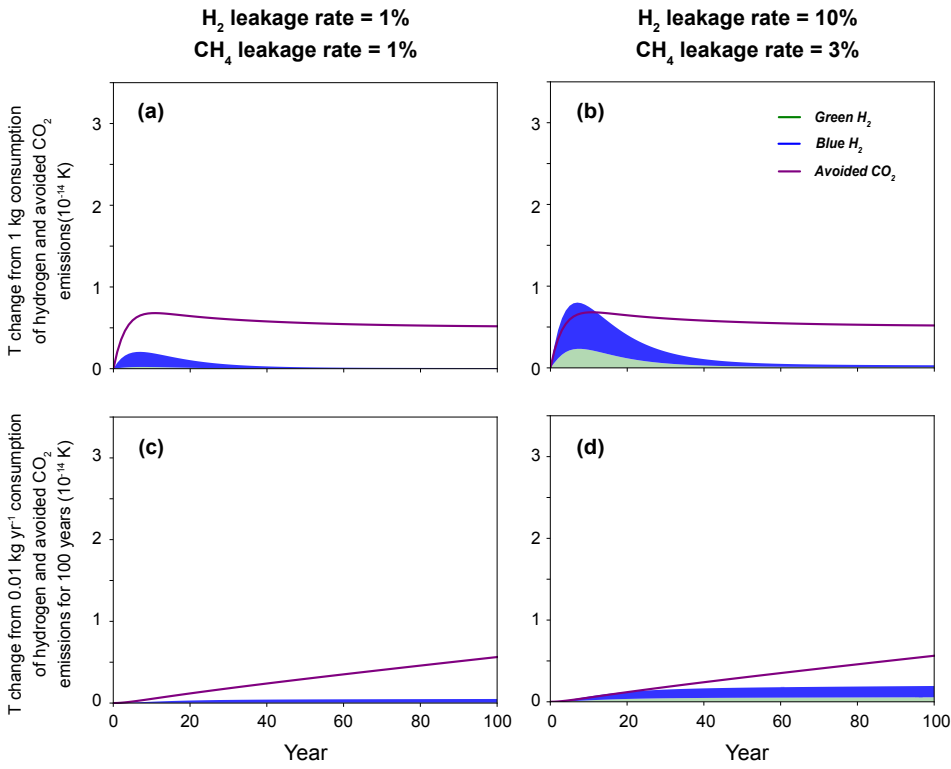

156

157 **Figure S15.** Similar to **Figure S5** but showing increases in climate impact per percentage  
 158 increase in the methane and hydrogen leakage rate.

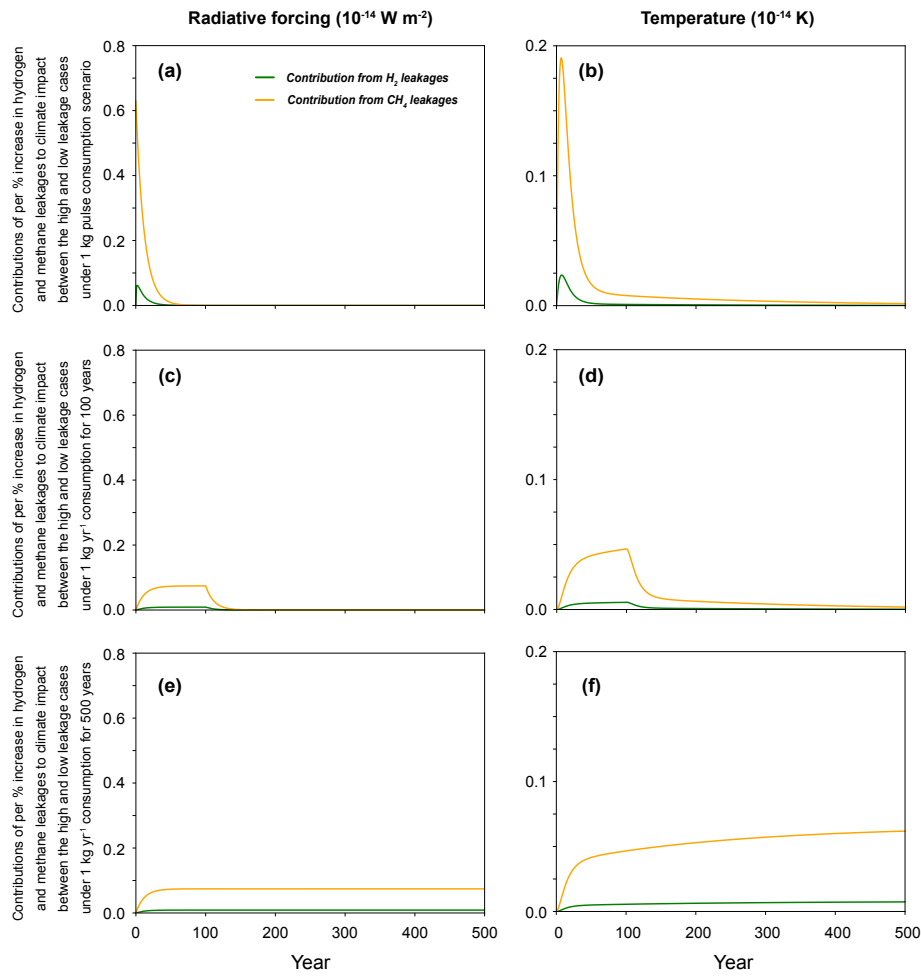

159

160 **Table S1.** Input parameters for radiative forcing calculations. Values are taken directly from  
 161 Table 1 of Ocko and Hamburg (2022).

| Variable <sup>1</sup> | Definition                                                              | Unit                                                                                                                               | Value                                                                     |
|-----------------------|-------------------------------------------------------------------------|------------------------------------------------------------------------------------------------------------------------------------|---------------------------------------------------------------------------|
| H                     | Time horizon                                                            | Years                                                                                                                              | 1-500                                                                     |
| $A_{CO_2}$            | Radiative forcing scaling factor                                        | W m <sup>-2</sup> ppb <sup>-1</sup>                                                                                                | $1.33 \times 10^{-5}$                                                     |
| $a_{0-3}$             | Coefficient for fraction of CO <sub>2</sub> remaining in the atmosphere | Unitless                                                                                                                           | $a_0 = 0.2173; a_1 = 0.224; a_2 = 0.2824; a_3 = 0.2763$                   |
| $\tau_{1-3}$          | Timescale for fraction of CO <sub>2</sub> remaining in the atmosphere   | Years                                                                                                                              | $\tau_1 = 394.4; \tau_2 = 36.54; \tau_3 = 4.304;$                         |
| $A_{CH_4}$            | Radiative forcing scaling factor                                        | W m <sup>-2</sup> ppb <sup>-1</sup>                                                                                                | $3.88 \times 10^{-4}$                                                     |
| $\tau$                | Perturbation lifetime                                                   | Years                                                                                                                              | 11.8                                                                      |
| $f_1$                 | Tropospheric ozone indirect effect scaling                              | Unitless                                                                                                                           | 0.37                                                                      |
| $f_2$                 | Stratospheric water vapor indirect effect scaling                       | Unitless                                                                                                                           | 0.106                                                                     |
| $\tau_{H_2}$          | H <sub>2</sub> lifetime (combined chemical and deposition lifetime)     | Years                                                                                                                              | 1.9 [1.4, 2.5]                                                            |
| $tp$                  | Length of step emission                                                 | Years                                                                                                                              | 1                                                                         |
| $A_i$                 | CH <sub>4</sub>                                                         | Radiative forcing scaling factor                                                                                                   | W m <sup>-2</sup> ppb <sup>-1</sup>                                       |
|                       | O <sub>3</sub>                                                          |                                                                                                                                    | W m <sup>-2</sup> DU <sup>-1</sup>                                        |
|                       | H <sub>2</sub> O                                                        |                                                                                                                                    | W m <sup>-2</sup> ppb <sup>-1</sup>                                       |
| $a_i$                 | CH <sub>4</sub>                                                         | Production rate of species resulting in the indirect forcing (mixing ratio per year) per ppb H <sub>2</sub> change at steady state | ppb(CH <sub>4</sub> ) ppb(H <sub>2</sub> ) <sup>-1</sup> yr <sup>-1</sup> |
|                       | O <sub>3</sub>                                                          |                                                                                                                                    | DU(CH <sub>4</sub> ) ppb(H <sub>2</sub> ) <sup>-1</sup> yr <sup>-1</sup>  |
|                       | H <sub>2</sub> O                                                        |                                                                                                                                    | ppb(H <sub>2</sub> O) ppb(H <sub>2</sub> ) <sup>-1</sup> yr <sup>-1</sup> |
| $\tau_i$              | CH <sub>4</sub>                                                         | Perturbation lifetime of species causing the radiative forcing                                                                     | Years                                                                     |
|                       | O <sub>3</sub>                                                          |                                                                                                                                    | Years                                                                     |
|                       | H <sub>2</sub> O                                                        |                                                                                                                                    | Years                                                                     |

162 <sup>1</sup> For conversion factors that convert mixing ratio into mass (in units of ppb kg<sup>-1</sup>), we used the relationship described in the IPCC  
 163 AR5 report (Myhre et al., 2013). The resulting number is  $2.82 \times 10^{-9}$  ppb kg<sup>-1</sup> for H<sub>2</sub>,  $3.53 \times 10^{-10}$  ppb kg<sup>-1</sup> for CH<sub>4</sub>, and  $1.28 \times$   
 164  $10^{-10}$  ppb kg<sup>-1</sup> for CO<sub>2</sub>.

165 **Table S2.** Radiative forcing, absolute global warming potential (AGWP), absolute global  
 166 temperature change potential (AGTP), and their ratios for 1 kg pulse emission of hydrogen,  
 167 methane, and carbon dioxide under different timescales (i.e., 20, 100, and 500 years).

| Time horizon                                |      |                                     | 20      | 100     | 500                      |
|---------------------------------------------|------|-------------------------------------|---------|---------|--------------------------|
| Hydrogen (H <sub>2</sub> )                  | RF   | 10 <sup>-15</sup> W m <sup>-2</sup> | 12.13   | 0.01    | 2.09×10 <sup>-17</sup>   |
|                                             | AGWP | 10 <sup>-15</sup> W m <sup>-2</sup> | 654.64  | 788.54  | 788.67                   |
|                                             | AGTP | 10 <sup>-15</sup> K                 | 10.54   | 0.82    | 0.16                     |
| Methane (CH <sub>4</sub> )                  | RF   | 10 <sup>-15</sup> W m <sup>-2</sup> | 36.98   | 0.04    | 7.97 × 10 <sup>-17</sup> |
|                                             | AGWP | 10 <sup>-15</sup> W m <sup>-2</sup> | 1940.06 | 2375.91 | 2376.40                  |
|                                             | AGTP | 10 <sup>-15</sup> K                 | 30.93   | 2.48    | 0.49                     |
| Carbon dioxide (CO <sub>2</sub> )           | RF   | 10 <sup>-15</sup> W m <sup>-2</sup> | 1.02    | 0.70    | 0.48                     |
|                                             | AGWP | 10 <sup>-15</sup> W m <sup>-2</sup> | 24.27   | 89.24   | 313.05                   |
|                                             | AGTP | 10 <sup>-15</sup> K                 | 0.58    | 0.47    | 0.43                     |
| Ratio of H <sub>2</sub> to CO <sub>2</sub>  | RF   | Unitless                            | 11.94   | 0.02    | 4.39×10 <sup>-17</sup>   |
|                                             | AGWP | Unitless                            | 26.97   | 8.84    | 2.52                     |
|                                             | AGTP | Unitless                            | 18.02   | 1.74    | 0.38                     |
| Ratio of CH <sub>4</sub> to CO <sub>2</sub> | RF   | Unitless                            | 36.39   | 0.06    | 1.67×10 <sup>-16</sup>   |
|                                             | AGWP | Unitless                            | 79.94   | 26.63   | 7.59                     |
|                                             | AGTP | Unitless                            | 52.87   | 5.26    | 1.15                     |

168



169 **Table S3.** Radiative forcing, absolute global warming potential (CAGWP), absolute global  
 170 temperature change potential (AGTP), and their ratios for 0.01 kg yr<sup>-1</sup> continuous emissions of  
 171 hydrogen, methane, and carbon dioxide under different timescales (i.e., 20, 100, and 500 years).

| Time horizon                                |       |                                     | 20     | 100     | 500      |
|---------------------------------------------|-------|-------------------------------------|--------|---------|----------|
| Hydrogen (H <sub>2</sub> )                  | RF    | 10 <sup>-15</sup> W m <sup>-2</sup> | 6.55   | 7.89    | 7.89     |
|                                             | CAGWP | 10 <sup>-15</sup> W m <sup>-2</sup> | 81.58  | 697.45  | 3852.13  |
|                                             | AGTP  | 10 <sup>-15</sup> K                 | 3.12   | 4.96    | 6.57     |
| Methane (CH <sub>4</sub> )                  | RF    | 10 <sup>-15</sup> W m <sup>-2</sup> | 19.40  | 23.76   | 23.76    |
|                                             | CAGWP | 10 <sup>-15</sup> W m <sup>-2</sup> | 246.35 | 2096.05 | 11601.61 |
|                                             | AGTP  | 10 <sup>-15</sup> K                 | 9.27   | 14.93   | 19.81    |
| Carbon dioxide (CO <sub>2</sub> )           | RF    | 10 <sup>-15</sup> W m <sup>-2</sup> | 0.24   | 0.89    | 3.13     |
|                                             | CAGWP | 10 <sup>-15</sup> W m <sup>-2</sup> | 2.62   | 49.61   | 880.81   |
|                                             | AGTP  | 10 <sup>-15</sup> K                 | 0.11   | 0.51    | 2.32     |
| Ratio of H <sub>2</sub> to CO <sub>2</sub>  | RF    | Unitless                            | 26.97  | 8.84    | 2.52     |
|                                             | CAGWP | Unitless                            | 31.14  | 14.06   | 4.37     |
|                                             | AGTP  | Unitless                            | 29.12  | 9.68    | 2.84     |
| Ratio of CH <sub>4</sub> to CO <sub>2</sub> | RF    | Unitless                            | 79.94  | 26.63   | 7.59     |
|                                             | CAGWP | Unitless                            | 94.04  | 42.25   | 13.17    |
|                                             | AGTP  | Unitless                            | 86.47  | 29.15   | 8.54     |

172

173 **Table S4.** Radiative forcing, absolute global warming potential (AGWP), absolute global  
 174 temperature change potential (AGTP), and their ratios for 1 kg consumption of green and blue  
 175 hydrogen, and corresponding avoided CO<sub>2</sub> emissions under different timescales (i.e., 20, 100,  
 176 and 500 years).

| Emission assumptions                                     |      |                                     | 1% hydrogen and 1% methane |                       |                        | 10% hydrogen and 3% methane |                       |                        |
|----------------------------------------------------------|------|-------------------------------------|----------------------------|-----------------------|------------------------|-----------------------------|-----------------------|------------------------|
| Time horizon                                             |      |                                     | 20                         | 100                   | 500                    | 20                          | 100                   | 500                    |
| Green H <sub>2</sub>                                     | RF   | 10 <sup>-15</sup> W m <sup>-2</sup> | 0.12                       | 1.13×10 <sup>-4</sup> | 2.12×10 <sup>-19</sup> | 1.35                        | 1.24×10 <sup>-3</sup> | 2.33×10 <sup>-18</sup> |
|                                                          | AGWP | 10 <sup>-15</sup> W m <sup>-2</sup> | 6.61                       | 7.97                  | 7.97                   | 72.74                       | 87.62                 | 87.63                  |
|                                                          | AGTP | 10 <sup>-15</sup> K                 | 0.11                       | 0.01                  | 1.65×10 <sup>-3</sup>  | 1.17                        | 0.09                  | 0.02                   |
| Blue H <sub>2</sub>                                      | RF   | 10 <sup>-15</sup> W m <sup>-2</sup> | 1.24                       | 0.00                  | 2.63×10 <sup>-18</sup> | 4.78                        | 0.01                  | 9.73×10 <sup>-18</sup> |
|                                                          | AGWP | 10 <sup>-15</sup> W m <sup>-2</sup> | 65.40                      | 79.96                 | 79.98                  | 252.74                      | 308.06                | 308.12                 |
|                                                          | AGTP | 10 <sup>-15</sup> K                 | 1.04                       | 0.08                  | 0.02                   | 4.04                        | 0.32                  | 0.06                   |
| Avoided CO <sub>2</sub>                                  | RF   | 10 <sup>-15</sup> W m <sup>-2</sup> | 11.18                      | 7.68                  | 5.26                   | 11.18                       | 7.68                  | 5.26                   |
|                                                          | AGWP | 10 <sup>-15</sup> W m <sup>-2</sup> | 266.96                     | 981.59                | 3443.59                | 266.96                      | 981.59                | 3443.59                |
|                                                          | AGTP | 10 <sup>-15</sup> K                 | 6.43                       | 5.19                  | 4.69                   | 6.43                        | 5.19                  | 4.69                   |
| Ratio of green H <sub>2</sub> to avoided CO <sub>2</sub> | RF   | Unitless                            | 0.01                       | 1.47×10 <sup>-5</sup> | 4.03×10 <sup>-20</sup> | 0.12                        | 1.62×10 <sup>-4</sup> | 4.43×10 <sup>-19</sup> |
|                                                          | AGWP | Unitless                            | 0.02                       | 0.01                  | 2.31×10 <sup>-3</sup>  | 0.27                        | 0.09                  | 0.03                   |
|                                                          | AGTP | Unitless                            | 0.02                       | 1.60×10 <sup>-3</sup> | 3.51×10 <sup>-4</sup>  | 0.18                        | 0.02                  | 3.86×10 <sup>-3</sup>  |
| Ratio of blue H <sub>2</sub> to avoided CO <sub>2</sub>  | RF   | Unitless                            | 0.11                       | 1.81×10 <sup>-4</sup> | 5×10 <sup>-19</sup>    | 0.43                        | 6.70×10 <sup>-4</sup> | 1.85×10 <sup>-18</sup> |
|                                                          | AGWP | Unitless                            | 0.24                       | 0.08                  | 0.02                   | 0.95                        | 0.31                  | 0.09                   |
|                                                          | AGTP | Unitless                            | 0.16                       | 0.02                  | 3.53×10 <sup>-3</sup>  | 0.63                        | 0.06                  | 0.01                   |

177

178 **Table S5.** Radiative forcing, absolute global warming potential (CAGWP), absolute global  
 179 temperature change potential (AGTP), and their ratios for 0.01 kg yr<sup>-1</sup> continuous consumption  
 180 of green and blue hydrogen, and corresponding avoided CO<sub>2</sub> emission under different timescales  
 181 (i.e., 20, 100, and 500 years).

| Emission assumptions                                     |       |                                     | 1% hydrogen and 1% methane |        |                       | 10% hydrogen and 3% methane |        |         |
|----------------------------------------------------------|-------|-------------------------------------|----------------------------|--------|-----------------------|-----------------------------|--------|---------|
| Time horizon                                             |       |                                     | 20                         | 100    | 500                   | 20                          | 100    | 500     |
| Green H <sub>2</sub>                                     | RF    | 10 <sup>-15</sup> W m <sup>-2</sup> | 0.07                       | 0.08   | 0.08                  | 0.73                        | 0.88   | 0.88    |
|                                                          | CAGWP | 10 <sup>-15</sup> W m <sup>-2</sup> | 0.82                       | 7.04   | 38.91                 | 9.06                        | 77.49  | 428.01  |
|                                                          | AGTP  | 10 <sup>-15</sup> K                 | 0.03                       | 0.05   | 0.07                  | 0.35                        | 0.55   | 0.73    |
| Blue H <sub>2</sub>                                      | RF    | 10 <sup>-15</sup> W m <sup>-2</sup> | 0.65                       | 0.80   | 0.80                  | 2.53                        | 3.08   | 3.08    |
|                                                          | CAGWP | 10 <sup>-15</sup> W m <sup>-2</sup> | 8.29                       | 70.56  | 390.47                | 31.92                       | 271.97 | 1504.45 |
|                                                          | AGTP  | 10 <sup>-15</sup> K                 | 0.31                       | 0.50   | 0.67                  | 1.21                        | 1.94   | 2.57    |
| Avoided CO <sub>2</sub>                                  | RF    | 10 <sup>-15</sup> W m <sup>-2</sup> | 2.67                       | 9.82   | 34.44                 | 2.67                        | 9.82   | 34.44   |
|                                                          | CAGWP | 10 <sup>-15</sup> W m <sup>-2</sup> | 28.82                      | 545.67 | 9688.89               | 28.82                       | 545.67 | 9688.89 |
|                                                          | AGTP  | 10 <sup>-15</sup> K                 | 1.18                       | 5.63   | 25.50                 | 1.18                        | 5.63   | 25.50   |
| Ratio of green H <sub>2</sub> to avoided CO <sub>2</sub> | RF    | Unitless                            | 0.02                       | 0.01   | 2.31×10 <sup>-3</sup> | 0.27                        | 0.09   | 0.03    |
|                                                          | CAGWP | Unitless                            | 0.03                       | 0.01   | 4.02×10 <sup>-3</sup> | 0.31                        | 0.14   | 0.04    |
|                                                          | AGTP  | Unitless                            | 0.03                       | 0.01   | 2.60×10 <sup>-3</sup> | 0.29                        | 0.10   | 0.03    |
| Ratio of blue H <sub>2</sub> to avoided CO <sub>2</sub>  | RF    | Unitless                            | 0.24                       | 0.08   | 0.02                  | 0.95                        | 0.31   | 0.09    |
|                                                          | CAGWP | Unitless                            | 0.29                       | 0.13   | 0.04                  | 1.11                        | 0.50   | 0.16    |
|                                                          | AGTP  | Unitless                            | 0.26                       | 0.09   | 0.03                  | 1.02                        | 0.34   | 0.10    |

182

183 **Reference**

184 Boucher, O. and Reddy, M. S.: Climate trade-off between black carbon and carbon dioxide  
185 emissions, *Energy Policy*, 36, 193–200, 2008.

186 Caldeira, K. and Myhrvold, N. P.: Projections of the pace of warming following an abrupt  
187 increase in atmospheric carbon dioxide concentration, *Environ. Res. Lett.*, 2013.

188 Myhre, G., Shindell, D., Bréon, F.-M., Collins, W., Fuglestedt, J., Huang, J., Koch, D., Lamarque,  
189 J.-F., Lee, D., Mendoza, B., Nakajima, T., Robock, A., Stephens, G., Takemura, T., and Zhang, H.:  
190 Anthropogenic and Natural Radiative Forcing, in: *Climate change 2013 : the physical science*  
191 *basis; Working Group I contribution to the fifth assessment report of the Intergovernmental*  
192 *Panel on Climate Change*, edited by: Stocker, T.F., D. Qin, G.-K. Plattner, M. Tignor, S.K. Allen, J.  
193 Boschung, A. Nauels, Y. Xia, V. Bex and P.M. Midgley, Cambridge University Press, Cambridge,  
194 United Kingdom and New York, NY, USA., 659–740, 2013.

195 Ocko and Hamburg: Climate consequences of hydrogen emissions, *Atmos. Chem. Phys.*  
196 *Discuss.*, 2022.

197 Warwick, N., Griffiths, P., Keeble, J., Archibald, A., and Pyle, J.: Atmospheric implications of  
198 increased Hydrogen use, [https://www.gov.uk/government/publications/atmospheric-](https://www.gov.uk/government/publications/atmospheric-implications-of-increased-hydrogen-use)  
199 [implications-of-increased-hydrogen-use](https://www.gov.uk/government/publications/atmospheric-implications-of-increased-hydrogen-use), 8 April 2022.
